# Supplementary material for: Increasing soil carbon stocks in eight permanent forest plots in China
Source: Copernicus journal article supplement (doi:10.5194/bg-17-715-2020), 2020-02-11
Supplement: Supplementary file 1 [file bg-17-715-2020-supplement.pdf]

Supplement of Biogeosciences, 17, 715–726, 2020  
<https://doi.org/10.5194/bg-17-715-2020-supplement>  
© Author(s) 2020. This work is distributed under  
the Creative Commons Attribution 4.0 License.

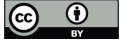

*Supplement of*

## **Increasing soil carbon stocks in eight permanent forest plots in China**

**Jianxiao Zhu et al.**

*Correspondence to:* Jingyun Fang ([jyfang@urban.pku.edu.cn](mailto:jyfang@urban.pku.edu.cn))

The copyright of individual parts of the supplement might differ from the CC BY 4.0 License.

# 1 **Supporting information**

2

## 3 **Supplementary Materials and Methods**

### 4 **Study sites and field measurements**

5 The sites of this study were selected in boreal, temperate, subtropical and tropical forests  
6 spanning approximately 26° latitude in the eastern China (Fig. 1, Table 1). The detailed  
7 information about each site is described below.

8 **Boreal forest:** The boreal site was established in Tahe, Great Xing'anling, northeastern China  
9 (52°38'42"N, 123°46'08"E), in May 1998 (Wang et al., 2001). The topography is gently  
10 undulating with an average slope of 10°. The elevation is 466 m. The mean annual  
11 temperature (MAT) and precipitation (MAP) are -4.3 °C and 477 mm, respectively. The  
12 frost-free period is shorter than 100 days, and the snow pack lasts for approximately 5 months  
13 in this region. The *Larix* forest was a 100-year-old mature forest at the time of the first  
14 sampling, dominated by *Larix gmelinii* accompanied by *Betula platyphylla*, *Pinus sylvestris*,  
15 *Picea koraiensis*, and *Populus davidiana*. The understory is dominated by *Ledum palustre*.  
16 The parent material is granite bedrock, and the soil is a dark brown forest soil. The soil in the  
17 plots has depths of 30–40 cm, with a pH between 5.0 and 6.0.

18 **Temperate forests:** The temperate site on Mt. Dongling stands near the Xiaolongmen  
19 forestland (39°57'04"N–39°57'35"N, 115°25'25"E–115°25'45"E), Beijing, China. The  
20 temperate forests in this region are protected and have not experienced serious anthropogenic  
21 disturbance (Fang et al., 2007). The MAT and MAP were 4.8 °C and 612 mm, respectively  
22 (Fig. 1, Table 1). We selected three plots from the top to the foot of a mountain as the  
23 temperate plots of deciduous broadleaf birch (*Betula platyphylla*) and oak (*Quercus*  
24 *wutaishanica*) forests and a pine (*Pinus tabulaeformis*) plantation in 1992. The soil in this  
25 region has a depth of 90–110 cm and a pH that ranges between 6.0 and 7.0.

26 The birch plot is located on a northwest-facing slope near the peak of the mountain, with  
27 an elevation of 1,350 m. The forest is dominated by *B. platyphylla* accompanied by *B. utilis*  
28 and *Populus alba*. The woody plants in the understory include *Sorbus pohuashanensis*,  
29 *Lonicera japonica*, *Prunus armeniaca*, *Corylus mandshurica*, *Acer mono*, *Abelia biflora*,  
30 *Leptodermis oblonga*, *Spiraea sargentiana*, and *Macrocarpium officinalis*. The oak plot is  
31 located on a southwest-facing slope on the middle of the mountain, with an elevation of 1,150  
32 m. The forest is a secondary forest recovered from human disturbance, dominated by *Q.*  
33 *wutaishanica* accompanied by *B. utili*. The understory woody plants include *S. sargentiana*, *A.*  
34 *mono*, *Lespedeza bicolor*, *L. japonica*, *C. mandshurica*, and *Deutzia scabra*. Both the birch  
35 and the oak forests are secondary deciduous broadleaf forests (55 years at the time of the first  
36 sampling). The pine forest is on a southeast-facing slope at the foot of the mountain, with an  
37 altitude of 1,050 m. The pine forest was a 30-year-old plantation at the time of the first  
38 sampling, dominated by only one tree species, *P. tabuliformis*, with very few plants in the  
39 understory and a thick litter floor.

40 **Subtropical forests:** The subtropical site is located in the Dinghushan Biosphere Reserve  
41 (23°09'21"N–23°11'30"N, 112°30'39"E–112°33'41"E) in Guangdong Province, China. The  
42 region has a typical southern subtropical monsoon climate (warm and humid). The MAP is  
43 1,678 mm, 80% of which falls in the wet season (April to September), and the MAT is  
44 22.3 °C. The altitude in the reserve ranges from 10 m to 1,000 m. The bedrock is sandstone  
45 and shale, with a pH that ranges between 4.0 and 4.9.

46 A 50 × 50 m<sup>2</sup> plot, representative of the monsoon evergreen broadleaf forests in the  
47 region, was established in 1979 at an elevation of 275 m on a south-facing slope. The  
48 evergreen broadleaf forest has not been disturbed for more than 400 years (Zhou et al., 2006).  
49 The plants in the evergreen plot are typical and natives of tropics and subtropics, including  
50 *Castanopsis chinensis*, *Canarium pimela*, *Schima superba*, and *Engelhardtia roxburghiana*,

51 among others. The sub-canopy layer is mainly composed of *Cryptocarya concinna* and  
52 *Machilus chinensis*. Another two 30 × 40 m<sup>2</sup> plots had also been established in 1979. The pine  
53 (*Pinus massoniana*) plantation and the mature mixed pine and broadleaf forests are the other  
54 two most common forest communities that represent the early- and mid-successional stages of  
55 monsoon evergreen broadleaf forest, respectively, in this region. The age of the pine  
56 plantation was approximately 40 years at the time of the first sampling.

57 **Tropical forest:** The tropical site was established in the Jianfengling National Natural  
58 Reserve (18°23'N–18°50'N, 108°36'E–109°05'E) on southwestern Hainan Island, China, in  
59 1992 (Zhou et al., 2013). The region has a typical tropical mountain rain forest with an  
60 elevation of 800–1,000 m. The MAT and MAP were 19.8 °C and 2,449 mm, respectively. The  
61 primary forest in this region has not been disturbed for more than 300 years and is dominated  
62 by species in families Lauraceae and Fagaceae, e.g., *Mallotus hookerianus*, *Gironniera*  
63 *subaequali*, *Cryptocarya chinensis*, *Cyclobalanopsis patelliformis* and *Nephel-ium topengii*.  
64 The soils are lateritic yellow soil, with a pH that ranges between 4.3 and 4.7.

65

## 66 **References**

- 67 Fang, J. Y., Liu, G. H., Zhu, B., Wang, X. K., and Liu, S. B.: Carbon budgets of three  
68 temperate forest ecosystems in Dongling Mt., Beijing, China. *Sci. China Earth Sci.*, 50,  
69 92–101, <https://doi.org/10.1007/s11430-007-2031-3>, 2007.
- 70 Wang, C., Gower, S. T., Wang, Y., Zhao, H., Yan, P., and Bond-Lamberty, B. P.: The  
71 influence of fire on carbon distribution and net primary production of boreal *Larix*  
72 *gmelinii* forests in north-eastern China. *Glob. Change Biol.*, 7, 719–730,  
73 <https://doi.org/10.1046/j.1354-1013.2001.00441.x>, 2001.
- 74 Zhou, G., Liu, S., Li, Z., Zhang, D., Tang, X., Zhou, C., Yan, J., Mo, J.: Old-growth forests  
75 can accumulate carbon in soils. *Science*, 314, 1417, <https://doi:10.1126/science.1130168>,

76 2006.

77 Zhou, Z., Jiang, L., Du, E., Hu, H., Li, Y., Chen, D., and Fang, J.: Temperature and substrate  
78 availability regulate soil respiration in the tropical mountain rainforests, Hainan Island,  
79 China. *J. Plant Ecol.*, 6, 325–334, <https://doi.org/10.1093/jpe/rtt034>, 2013.

80

81 **Table S1.** Allometric equations of above-ground biomass by species and sites used in this  
 82 study. The equations are expressed as  $B=a (D^2 H)^b$ , where  $B$ ,  $D$ , and  $H$  are the biomass (kg),  
 83 DBH (cm) and height (m) of each stem, respectively.

| Site                   | Species                                     | Component      | a        | b        | $R^2$ |
|------------------------|---------------------------------------------|----------------|----------|----------|-------|
| Boreal                 | <i>Larix gmelinii</i>                       | Bole           | 0.01258  | 0.99331  | 0.99  |
|                        |                                             | Branch         | 0.00136  | 1.02797  | 0.99  |
|                        |                                             | Leaf and Fruit | 0.01009  | 0.64543  | 0.98  |
|                        | <i>Betula platyphylla</i>                   | Bole           | 0.02853  | 0.89271  | 0.99  |
|                        |                                             | Branch         | 0.00278  | 1.02568  | 0.99  |
|                        |                                             | Leaf and Fruit | 0.01545  | 0.61265  | 0.98  |
| Temperate              | <i>Pinus tabulaeformis</i>                  | Stem           | 0.0475   | 0.8539   | 0.98  |
|                        |                                             | Branch         | 0.0017   | 1.1515   | 0.94  |
|                        |                                             | Leaf           | 0.0134   | 0.8099   | 0.92  |
|                        |                                             | Fruit          | 0.0013   | 0.9055   | 0.27  |
|                        | <i>Betula platyphylla &amp; B. dahurica</i> | Stem           | 0.0319   | 0.9356   | 0.99  |
|                        |                                             | Branch         | 0.00063  | 1.2781   | 0.91  |
|                        |                                             | Leaf and Fruit | 0.00016  | 1.1688   | 0.88  |
|                        | <i>Quercus wutaishanica</i>                 | Stem           | 0.0369   | 0.9165   | 0.99  |
|                        |                                             | Branch         | 0.00051  | 1.3377   | 0.9   |
|                        |                                             | Leaf and Fruit | 0.00021  | 1.171    | 0.95  |
|                        | <i>Populus davidiana</i>                    | Stem           | 0.2286   | 0.6933   | 0.98  |
|                        |                                             | Branch         | 0.0247   | 0.7378   | 0.96  |
|                        |                                             | Leaf and Fruit | 0.0108   | 0.8181   | 0.98  |
|                        | <i>Acer mono</i>                            | Stem           | 0.03136  | 0.9775   | 0.99  |
|                        |                                             | Branch         | 0.00588  | 1.103    | 0.98  |
|                        |                                             | Leaf and Fruit | 0.01141  | 0.8803   | 0.98  |
|                        | <i>Ulmus macrocarpa</i>                     | Stem           | 0.05229  | 0.891    | 0.99  |
|                        |                                             | Branch         | 0.01233  | 0.9359   | 0.91  |
|                        |                                             | Leaf and Fruit | 0.01736  | 0.7738   | 0.85  |
|                        | <i>Fraxinus rhynchophylla</i>               | Stem           | 0.06013  | 0.8906   | 0.99  |
|                        |                                             | Branch         | 0.00556  | 1.169    | 0.98  |
|                        |                                             | Leaf and Fruit | 0.00829  | 0.9919   | 0.98  |
|                        | <i>Juglans mandshurica</i>                  | Stem           | 0.02511  | 0.9271   | 0.99  |
|                        |                                             | Branch         | 0.00957  | 0.974    | 0.86  |
| Leaf and Fruit         |                                             | 0.08725        | 0.2634   | 0.81     |       |
| <i>Tilia mongolica</i> | Stem                                        | 0.0811         | 0.7994   | 0.99     |       |
|                        | Branch                                      | 0.05703        | 0.463    | 0.88     |       |
|                        | Leaf and Fruit                              | 0.001259       | 0.7802   | 0.98     |       |
| Sub-tropical           | All species                                 | Stem           | 0.0608   | 2.5585   | 0.97  |
|                        |                                             | Branch         | 0.0254   | 2.587    | 0.97  |
|                        |                                             | Leaf and Fruit | 0.0385   | 2.0739   | 0.97  |
| Tropical               | All species                                 | Stem           | 0.022816 | 0.992674 | 0.98  |
|                        |                                             | Branch         | 0.005915 | 0.999046 | 0.98  |
|                        |                                             | Leaf and Fruit | 0.005997 | 0.804661 | 0.98  |

84

85

86 **Table S2.** Mean soil organic carbon (SOC) content, bulk density, and SOC stock at the 0–10  
 87 and 10–20 cm depths in the 1990s and the 2010s at the four forest biomes.

| Biome                | Forest type | 0-10 cm          |                  |                     | 10-20 cm        |                  |                    |
|----------------------|-------------|------------------|------------------|---------------------|-----------------|------------------|--------------------|
|                      |             | 1990s            | 2010s            | Change rate         | 1990s           | 2010s            | Change rate        |
| <b>SOC content*</b>  |             |                  |                  |                     |                 |                  |                    |
| Boreal               | Larch       | 7.9±1.4          | 8.1±1.2          | +0.02±0.00          | 1.8±0.4         | 1.9±0.8          | +0.01±0.00         |
| Temperate            | Birch       | 8.8±4.5          | 8.7±1.7          | -0.00±0.00          | 3.3±1.3         | 3.7±0.3          | +0.02±0.01         |
|                      | Oak         | 4.3±0.1          | 4.8±0.6          | +0.03±0.00          | 3.2±0.0         | 3.3±0.9          | +0.01±0.00         |
|                      | Pine        | 3.1±0.4          | 4.3±1.5          | +0.06±0.02          | 2.8±0.1         | 3.2±0.7          | +0.02±0.00         |
|                      | <b>Mean</b> | <b>5.4±3.0</b>   | <b>6.0±2.4</b>   | <b>+0.03±0.03</b>   | <b>3.1±0.3</b>  | <b>3.4±0.3</b>   | <b>+0.02±0.01</b>  |
| Subtropical          | Evergreen   | 2.5±0.4          | 3.6±0.4          | +0.05±0.01          | 1.3±0.2         | 1.7±0.3          | +0.02±0.00         |
|                      | Mixed       | 1.8±0.5          | 2.5±0.4          | +0.03±0.01          | 1.0±0.1         | 1.1±0.3          | +0.01±0.00         |
|                      | Pine        | 1.1±0.3          | 1.7±0.2          | +0.03±0.01          | 0.7±0.2         | 0.7±0.2          | +0.00±0.00         |
|                      | <b>Mean</b> | <b>1.8±0.7</b>   | <b>2.6±1.0</b>   | <b>+0.04±0.01</b>   | <b>1.0±0.3</b>  | <b>1.1±0.5</b>   | <b>+0.01±0.01</b>  |
| Tropical             | Evergreen   | 2.5±0.5          | 3.2±1.0          | +0.03±0.01          | 1.4±0.2         | 1.4±0.3          | +0.00±0.00         |
| <b>Mean</b>          |             | <b>4.0±2.8</b>   | <b>4.6±2.6</b>   | <b>+0.03±0.02</b>   | <b>1.9±1.1</b>  | <b>2.1±1.2</b>   | <b>+0.01±0.01</b>  |
| <b>Bulk density*</b> |             |                  |                  |                     |                 |                  |                    |
| Boreal               | Larch       | 0.3±0.1          | 0.3±0.1          | +2.6±0.5            | 1.4±0.3         | 1.3±0.2          | -5.2±1.1           |
| Temperate            | Birch       | 0.5±0.4          | 0.6±0.1          | +4.6±2.3            | 0.9±0.1         | 0.9±0.1          | -3.0±0.3           |
|                      | Oak         | 0.9±0.0          | 0.8±0.1          | -3.6±0.3            | 1.0±0.1         | 1.0±0.1          | -0.1±0.0           |
|                      | Pine        | 1.1±0.1          | 0.9±0.2          | -5.5±0.6            | 1.1±0.0         | 1.1±0.1          | +0.1±0.0           |
|                      | <b>Mean</b> | <b>0.8±0.3</b>   | <b>0.8±0.2</b>   | <b>-1.5±5.3</b>     | <b>1.0±0.1</b>  | <b>1.0±0.1</b>   | <b>-1.0±1.7</b>    |
| Subtropical          | Evergreen   | 0.9±0.1          | 0.8±0.0          | -3.0±0.2            | 1.0±0.1         | 0.9±0.0          | -3.4±0.2           |
|                      | Mixed       | 1.1±0.1          | 0.9±0.0          | -11.3±0.5           | 1.1±0.1         | 1.1±0.0          | -2.4±0.1           |
|                      | Pine        | 1.3±0.1          | 1.1±0.0          | -8.5±0.3            | 1.3±0.1         | 1.1±0.0          | -8.9±0.3           |
|                      | <b>Mean</b> | <b>1.1±0.2</b>   | <b>0.9±0.1</b>   | <b>-7.7±4.2</b>     | <b>1.1±0.2</b>  | <b>1.0±0.1</b>   | <b>-4.9±3.5</b>    |
| Tropical             | Evergreen   | 1.1±0.0          | 1.2±0.2          | +1.9±0.2            | 1.1±0.1         | 1.2±0.1          | +2.9±0.2           |
| <b>Mean</b>          |             | <b>0.9±0.3</b>   | <b>0.8±0.3</b>   | <b>-3.1±5.6</b>     | <b>1.1±0.2</b>  | <b>1.1±0.2</b>   | <b>-2.5±3.6</b>    |
| <b>SOC stock*</b>    |             |                  |                  |                     |                 |                  |                    |
| Boreal               | Larch       | 22.1±0.9         | 26.1±4.9         | +247.1±30.3         | 25.5±1.1        | 25.6±1.4         | +4.0±0.8           |
| Temperate            | Birch       | 44.2±1.0         | 51.8±2.2         | +379.4±12.6         | 30.4±8.8        | 32.1±0.8         | +82.7±13.2         |
|                      | Oak         | 38.6±2.3         | 40.1±10.9        | +72.7±12.3          | 30.7±2.6        | 31.7±7.5         | +47.9±8.3          |
|                      | Pine        | 32.5±2.5         | 40.7±9.7         | +413.2±68.4         | 30.1±2.6        | 34.4±9.5         | +217.6±40.5        |
|                      | <b>Mean</b> | <b>38.4±5.9</b>  | <b>44.2±6.6</b>  | <b>+288.4±187.5</b> | <b>30.4±0.3</b> | <b>32.7±1.5</b>  | <b>+116.1±89.5</b> |
| Subtropical          | Evergreen   | 22.6±4.0         | 30.1±3.8         | +375.0±55.9         | 13.1±2.0        | 15.5±3.1         | +123.3±21.6        |
|                      | Mixed       | 20.1±5.9         | 21.9±3.7         | +85.8±18.8          | 10.7±1.5        | 11.3±2.8         | +31.5±6.3          |
|                      | Pine        | 14.1±3.9         | 17.9±2.6         | +189.6±38.0         | 8.5±1.9         | 7.5±2.0          | -51.4±12.2         |
|                      | <b>Mean</b> | <b>18.9±4.3</b>  | <b>23.3±6.2</b>  | <b>+217.2±146.6</b> | <b>10.8±2.3</b> | <b>11.5±4.0</b>  | <b>+34.5±87.4</b>  |
| Tropical             | Evergreen   | 28.5±6.9         | 36.5±6.7         | +401.8±84.1         | 15.2±3.9        | 15.9±3.6         | +39.2±9.2          |
| <b>Mean</b>          |             | <b>27.8±10.1</b> | <b>33.1±11.2</b> | <b>+270.6±141.5</b> | <b>20.5±9.6</b> | <b>21.8±10.5</b> | <b>+61.9±81.2</b>  |

88 \*Shown are SOC contents (%) and their change rates (% yr<sup>-1</sup>), soil bulk density (g cm<sup>-3</sup>) and  
 89 their change rates (mg cm<sup>-3</sup> yr<sup>-1</sup>) and SOC stock (Mg C ha<sup>-1</sup>) and their change rates (kg C ha<sup>-1</sup>  
 90 yr<sup>-1</sup>) between the 1990s and the 2010s.

91 **Table S3.** Mean soil organic carbon (SOC) content, bulk density, SOC stock and their change rates during the past two decades at eight forest  
 92 sites, which are categorized into four forest biomes.  
 93

| Biome              | Forest type | SOC content (%) |                |                                   | Bulk density (g cm <sup>-3</sup> ) |                |                                                     | SOC stock (Mg C ha <sup>-1</sup> ) |                   |                                                       |                                     |
|--------------------|-------------|-----------------|----------------|-----------------------------------|------------------------------------|----------------|-----------------------------------------------------|------------------------------------|-------------------|-------------------------------------------------------|-------------------------------------|
|                    |             | 1990s           | 2010s          | Change rate (% yr <sup>-1</sup> ) | 1990s                              | 2010s          | Change rate (mg cm <sup>-3</sup> yr <sup>-1</sup> ) | 1990s                              | 2010s             | Change rate (kg C ha <sup>-1</sup> yr <sup>-1</sup> ) | Relative rate (% yr <sup>-1</sup> ) |
| 0–20 cm soil depth |             |                 |                |                                   |                                    |                |                                                     |                                    |                   |                                                       |                                     |
| Boreal             | Larch       | 2.8±0.6         | 3.2±0.9        | +0.02±0.01                        | 0.9±0.2                            | 0.8±0.1        | -1.3±0.3                                            | 47.6±2.0                           | 51.6±16.3         | 251.1±46.4                                            | +0.5±0.1                            |
| Temperate          | Birch       | 5.3±2.4         | 5.8±0.9        | +0.03±0.01                        | 0.7±0.3                            | 0.7±0.1        | +0.8±0.2                                            | 74.6±9.8                           | 83.8±3.0          | 462.1±37.2                                            | +0.6±0.1                            |
|                    | Oak         | 3.7±0.0         | 4.0±0.7        | +0.01±0.00                        | 0.9±0.1                            | 0.9±0.1        | -1.9±0.1                                            | 69.4±4.8                           | 71.8±18.5         | 120.6±19.9                                            | +0.2±0.0                            |
|                    | Pine        | 3.0±0.3         | 3.7±1.1        | +0.04±0.01                        | 1.1±0.1                            | 1.0±0.1        | -2.7±0.2                                            | 62.5±5.1                           | 75.1±19.2         | 630.8±111.2                                           | +1.0±0.2                            |
|                    | <b>Mean</b> | <b>4.2±1.0</b>  | <b>4.6±0.9</b> | <b>+0.03±0.01</b>                 | <b>0.9±0.1</b>                     | <b>0.9±0.1</b> | <b>-1.3±1.8</b>                                     | <b>68.8±6.1</b>                    | <b>76.9±6.2</b>   | <b>404.5±259.9</b>                                    | <b>+0.6±0.4</b>                     |
| Subtropical        | Evergreen   | 1.9±0.3         | 2.6±0.4        | +0.04±0.01                        | 1.0±0.1                            | 0.9±0.0        | -3.2±0.2                                            | 35.6±6.0                           | 45.6±6.9          | 498.3±78.8                                            | +1.4±0.2                            |
|                    | Mixed       | 1.4±0.3         | 1.7±0.3        | +0.02±0.00                        | 1.1±0.1                            | 1.0±0.0        | -6.9±0.3                                            | 30.8±7.3                           | 33.3±6.4          | 117.3±25.2                                            | +0.4±0.1                            |
|                    | Pine        | 0.9±0.2         | 1.2±0.2        | +0.01±0.00                        | 1.3±0.1                            | 1.1±0.0        | -8.7±0.3                                            | 22.7±5.8                           | 25.4±4.5          | 138.2±29.7                                            | +0.6±0.1                            |
|                    | <b>Mean</b> | <b>1.4±0.3</b>  | <b>1.8±0.3</b> | <b>+0.02±0.01</b>                 | <b>1.1±0.1</b>                     | <b>1.0±0.0</b> | <b>-6.3±2.8</b>                                     | <b>29.7±6.5</b>                    | <b>34.8±10.1</b>  | <b>251.3±214.2</b>                                    | <b>+0.9±0.5</b>                     |
| Tropical           | Evergreen   | 2.0±0.4         | 2.3±0.7        | +0.02±0.00                        | 1.1±0.0                            | 1.2±0.1        | +2.4±0.2                                            | 43.6±10.8                          | 52.5±10.3         | 441.0±96.6                                            | +1.0±0.2                            |
|                    | <b>Mean</b> | <b>2.9±0.6</b>  | <b>3.2±0.7</b> | <b>+0.02±0.00</b>                 | <b>1.0±0.1</b>                     | <b>1.0±0.1</b> | <b>-2.7±3.7</b>                                     | <b>48.4±18.8</b>                   | <b>54.9±20.6</b>  | <b>332.4±200.2</b>                                    | <b>+0.7±0.4</b>                     |
| Whole soil depth   |             |                 |                |                                   |                                    |                |                                                     |                                    |                   |                                                       |                                     |
| Boreal             | Larch       | 1.4±0.2         | 1.5±0.1        | +0.00±0.00                        | 1.2±0.2                            | 1.2±0.2        | +0.8±0.1                                            | 65.6±11.0                          | 69.4±6.2          | 243.4±31.1                                            | +0.4±0.1                            |
| Temperate          | Birch       | 2.0±0.3         | 2.1±0.2        | +0.01±0.00                        | 1.1±0.1                            | 1.0±0.2        | -2.8±0.4                                            | 207.0±31.7                         | 214.8±19.5        | 390.8±47.4                                            | +0.2±0.0                            |
|                    | Oak         | 2.0±0.7         | 2.4±0.2        | +0.02±0.00                        | 1.2±0.1                            | 1.0±0.1        | -10.3±0.9                                           | 239.1±80.4                         | 241.7±15.2        | 127.2±25.3                                            | +0.1±0.0                            |
|                    | Pine        | 1.8±0.5         | 1.9±0.3        | +0.00±0.00                        | 1.3±0.1                            | 1.3±0.1        | -0.1±0.0                                            | 231.7±67.0                         | 238.4±41.4        | 332.8±76.7                                            | +0.1±0.0                            |
|                    | <b>Mean</b> | <b>1.9±0.1</b>  | <b>2.1±0.1</b> | <b>+0.01±0.01</b>                 | <b>1.2±0.1</b>                     | <b>1.1±0.2</b> | <b>-4.3±5.3</b>                                     | <b>226.0±16.8</b>                  | <b>231.6±14.6</b> | <b>283.6±138.5</b>                                    | <b>+0.1±0.1</b>                     |
| Subtropical        | Evergreen   | 1.1±0.1         | 1.4±0.1        | +0.02±0.00                        | 1.1±0.1                            | 1.0±0.0        | -3.6±0.2                                            | 68.4±5.7                           | 86.6±4.5          | 907.5±60.1                                            | +1.3±0.1                            |
|                    | Mixed       | 0.7±0.1         | 1.0±0.1        | +0.01±0.00                        | 1.2±0.1                            | 1.1±0.04       | -3.8±0.2                                            | 51.4±5.5                           | 67.4±7.2          | 763.3±82.4                                            | +1.5±0.2                            |
|                    | Pine        | 0.6±0.1         | 0.7±0.1        | +0.01±0.00                        | 1.3±0.1                            | 1.1±0.0        | -9.0±0.3                                            | 43.5±5.7                           | 47.7±6.5          | 206.6±28.3                                            | +0.5±0.1                            |
|                    | <b>Mean</b> | <b>0.8±0.2</b>  | <b>1.1±0.3</b> | <b>+0.02±0.01</b>                 | <b>1.2±0.1</b>                     | <b>1.1±0.1</b> | <b>-5.5±3.0</b>                                     | <b>54.4±12.7</b>                   | <b>67.2±19.5</b>  | <b>627.6±370.1</b>                                    | <b>+1.1±0.5</b>                     |
| Tropical           | Evergreen   | 0.7±0.2         | 0.8±0.2        | +0.00±0.00                        | 1.3±0.0                            | 1.3±0.1        | +0.5±0.0                                            | 94.6±21.8                          | 102.6±19.9        | 397.9±84.2                                            | +0.4±0.1                            |
|                    | <b>Mean</b> | <b>1.3±0.3</b>  | <b>1.5±0.2</b> | <b>+0.01±0.01</b>                 | <b>1.2±0.1</b>                     | <b>1.1±0.1</b> | <b>-3.5±4.2</b>                                     | <b>125.2±85.2</b>                  | <b>133.6±83.1</b> | <b>421.2±274.4</b>                                    | <b>+0.6±0.5</b>                     |



94 **Table S4.** Measured carbon input rates and ratio of soil accumulation to the above-ground net primary production (ANPP) of the eight forest  
 95 types.

| Parameters                                                | Boreal       | Temperate    |               |               | Subtropical  |               | Tropical     |              |
|-----------------------------------------------------------|--------------|--------------|---------------|---------------|--------------|---------------|--------------|--------------|
|                                                           | Larch        | Birch        | Oak           | Pine          | Evergreen    | Mixed         | Pine         | Evergreen    |
| <b>Carbon pool (Mg C ha<sup>-1</sup>)</b>                 |              |              |               |               |              |               |              |              |
| AGB                                                       | 91.1±25.0    | 99.3±9.0     | 69.6±4.4      | 100.0±17.4    | 140.0±5.5    | 120.9±16.3    | 60.1±3.4     | 213.6±41.4   |
| Litter                                                    | 4.4±0.0      | 5.1±1.1      | 2.5±0.4       | 4.1±0.8       | 1.4±0.4      | 2.2±0.3       | 2.8±0.5      | 1.8±0.2      |
| Dead wood                                                 | 1.3±0.5      | 5.6±0.8      | 3.3±0.1       | 4.5±0.6       | 13.2±0.2     | 8.7±5.7       | 0.1±0.1      | 5.7±0.8      |
| Soil                                                      | 69.4±6.2     | 214.8±19.5   | 241.7±15.2    | 238.4±41.4    | 86.6±7.2     | 67.4±6.5      | 47.7±4.5     | 102.6±19.9   |
| Ecosystem total                                           | 166.2±31.7   | 324.9±30.3   | 317.1±20.2    | 346.9±60.2    | 241.2±13.3   | 199.2±28.8    | 110.7±8.5    | 323.7±62.3   |
| <b>Carbon flux (kg C ha<sup>-1</sup> yr<sup>-1</sup>)</b> |              |              |               |               |              |               |              |              |
| AGB growth                                                | 899.4±411.0  | 2075.2±253.3 | 1209.0±240.61 | 2144.4±495.76 | -1000.3±78.2 | 1911.0±207.58 | 1485.3±166.9 | 684.1±145.0  |
| Litterfall                                                | 2424.2±283.1 | 1630.2±220.4 | 1869.8±249.7  | 2340.1±310.0  | 4160.2±449.0 | 4277.3±272.8  | 1718.8±430.0 | 3970.0±279.8 |
| Fallen log                                                | 13.0±3.7     | 192.2±26.0   | 66.2±7.4      | 60.0±12.8     | 2070.3±221.2 | 679.5±43.6    | 210.3±50.8   | 1034.3±71.6  |
| Standing snag                                             | 3.5±1.8      | 337.9±46.8   | 343.8±46.1    | 148.5±18.5    | 346.8±42.3   | 76.9±3.2      | 236.3±56.9   | 803.4±62.4   |
| ANPP                                                      | 3340.1±698.8 | 4235.4±546.1 | 3488.8±544.2  | 4693.0±837.5  | 5577.0±789.8 | 6944.7±528.4  | 3650.6±704.7 | 6491.6±559.2 |
| Soil accumulation                                         | 243.4±31.1   | 390.8±47.4   | 127.2±25.3    | 332.8±76.7    | 907.5±60.1   | 763.3±82.4    | 206.6±28.3   | 397.9±84.2   |
| Ratio of soil accumulation to ANPP (%)                    | 7.3±7.8      | 9.2±3.8      | 3.6±3.4       | 7.1±5.4       | 16.3±4.2     | 11.0±3.0      | 5.7±3.5      | 6.1±3.3      |

96

97 **Table S5.** Summary for C pools and changes in each component of forests in China over the  
 98 past two decades.

| Component        | Carbon pool<br>(Pg C) | Carbon density<br>(Mg ha <sup>-1</sup> ) | National sink<br>(Tg C yr <sup>-1</sup> ) | Source                        |
|------------------|-----------------------|------------------------------------------|-------------------------------------------|-------------------------------|
| Biomass          | 6.9                   | 41.3                                     | 70.9                                      | Guo et al., 2013              |
| Soil             | 20.0                  | 106.1                                    | 57.1                                      | Tang et al., 2018; This study |
| Litter           | 0.5                   | 3.2                                      | 2.8                                       | Zhu et al., 2017              |
| Dead wood        | 0.4                   | 2.8                                      | 3.9                                       | Zhu et al., 2017              |
| <b>Ecosystem</b> | <b>27.4</b>           | <b>153.4</b>                             | <b>134.7</b>                              |                               |

99

100 **Figure S1.** Changes in soil organic carbon contents (left, %) and bulk densities (right,  $\text{g cm}^{-3}$ )  
 101 with soil depth for the eight forests in the 1990s and the 2010s in China. For the details on the  
 102 sites, see Table 1.  
 103

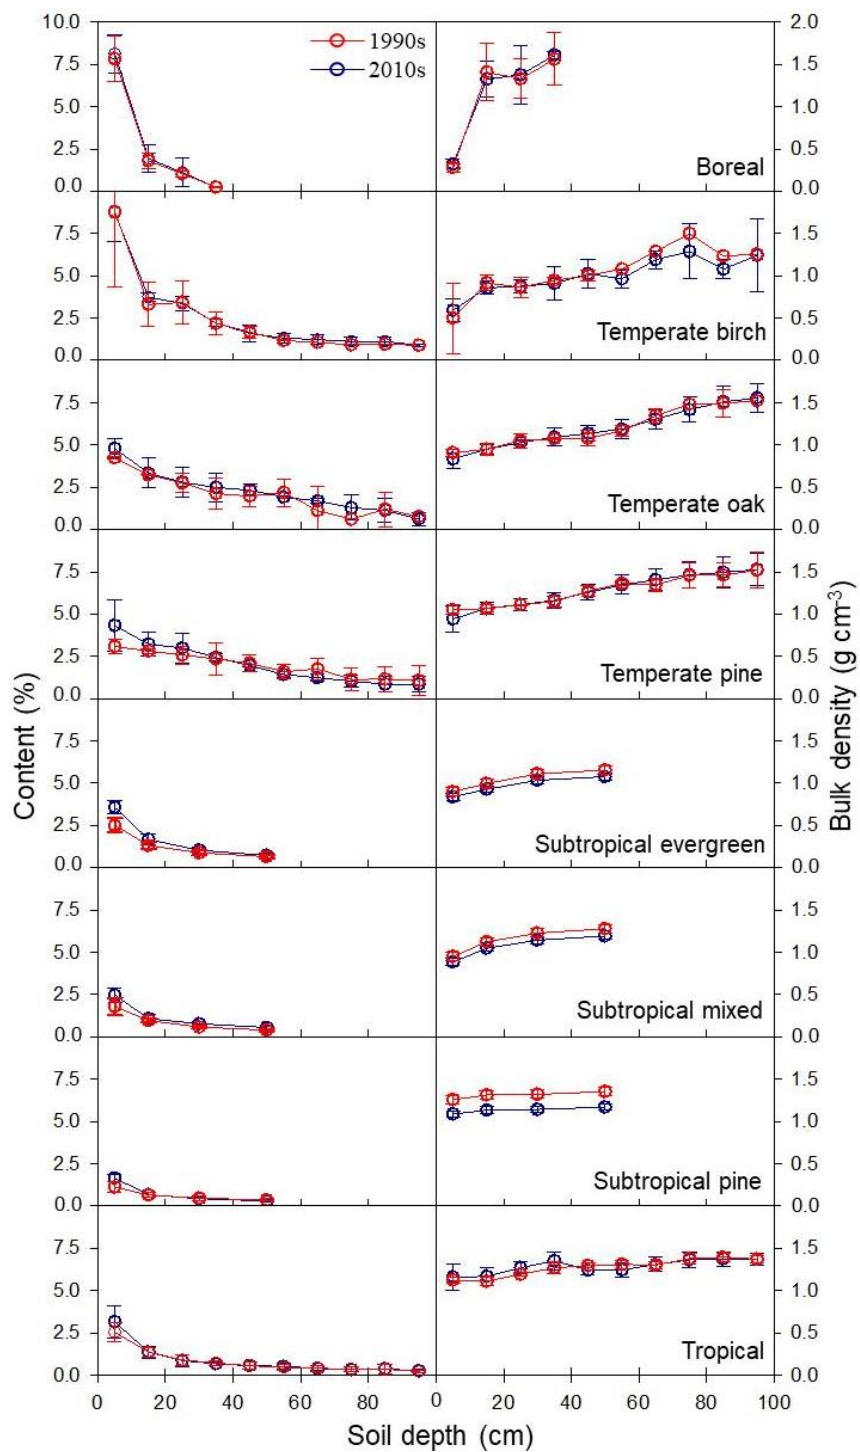

104  
 105

106 **Figure S2.** Comparison of soil organic carbon stocks of the surface soil depth (0-20 cm) in  
 107 the eight forest plots of China between the 1990s and the 2010s. The inset graph shows the  
 108 SOC change rates of the surface soil depth (0-20 cm) by forest biomes.  
 109

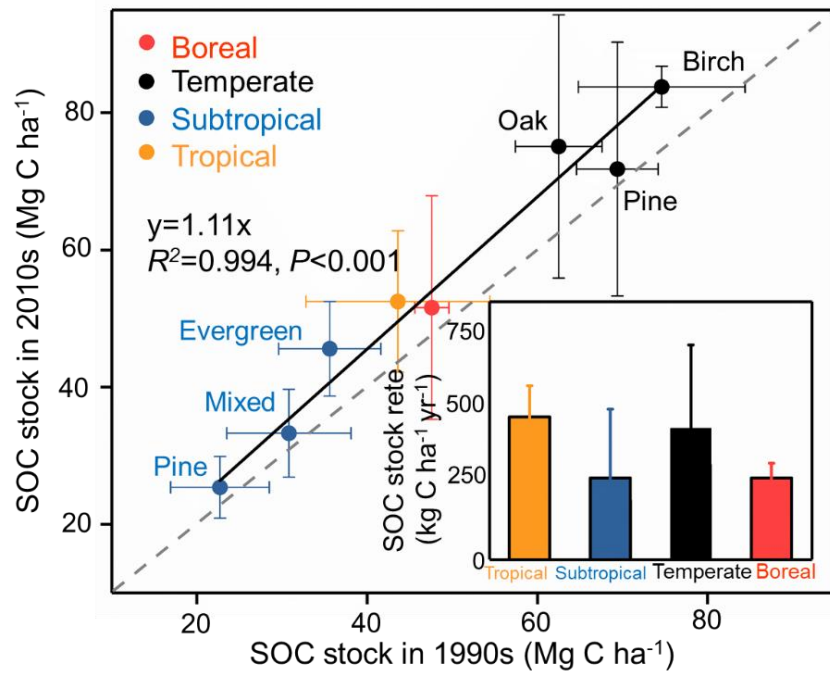

110
